# Supplementary material for: Prognosis for Pneumonic-Type Invasive Mucinous Adenocarcinoma in a Single Lobe on CT: Is It Reasonable to Designate It as Clinical T3?
Source: PubMed Central journal article supplement — Korean J Radiol. 2022 Feb 18;23(3):370–80. doi: 10.3348/kjr.2021.0465 (PMC8876658; doi:10.3348/kjr.2021.0465), 2022-02-18
Supplement: kjr-23-370-s001.pdf [file kjr-23-370-s001.pdf]

## SUPPLEMENT

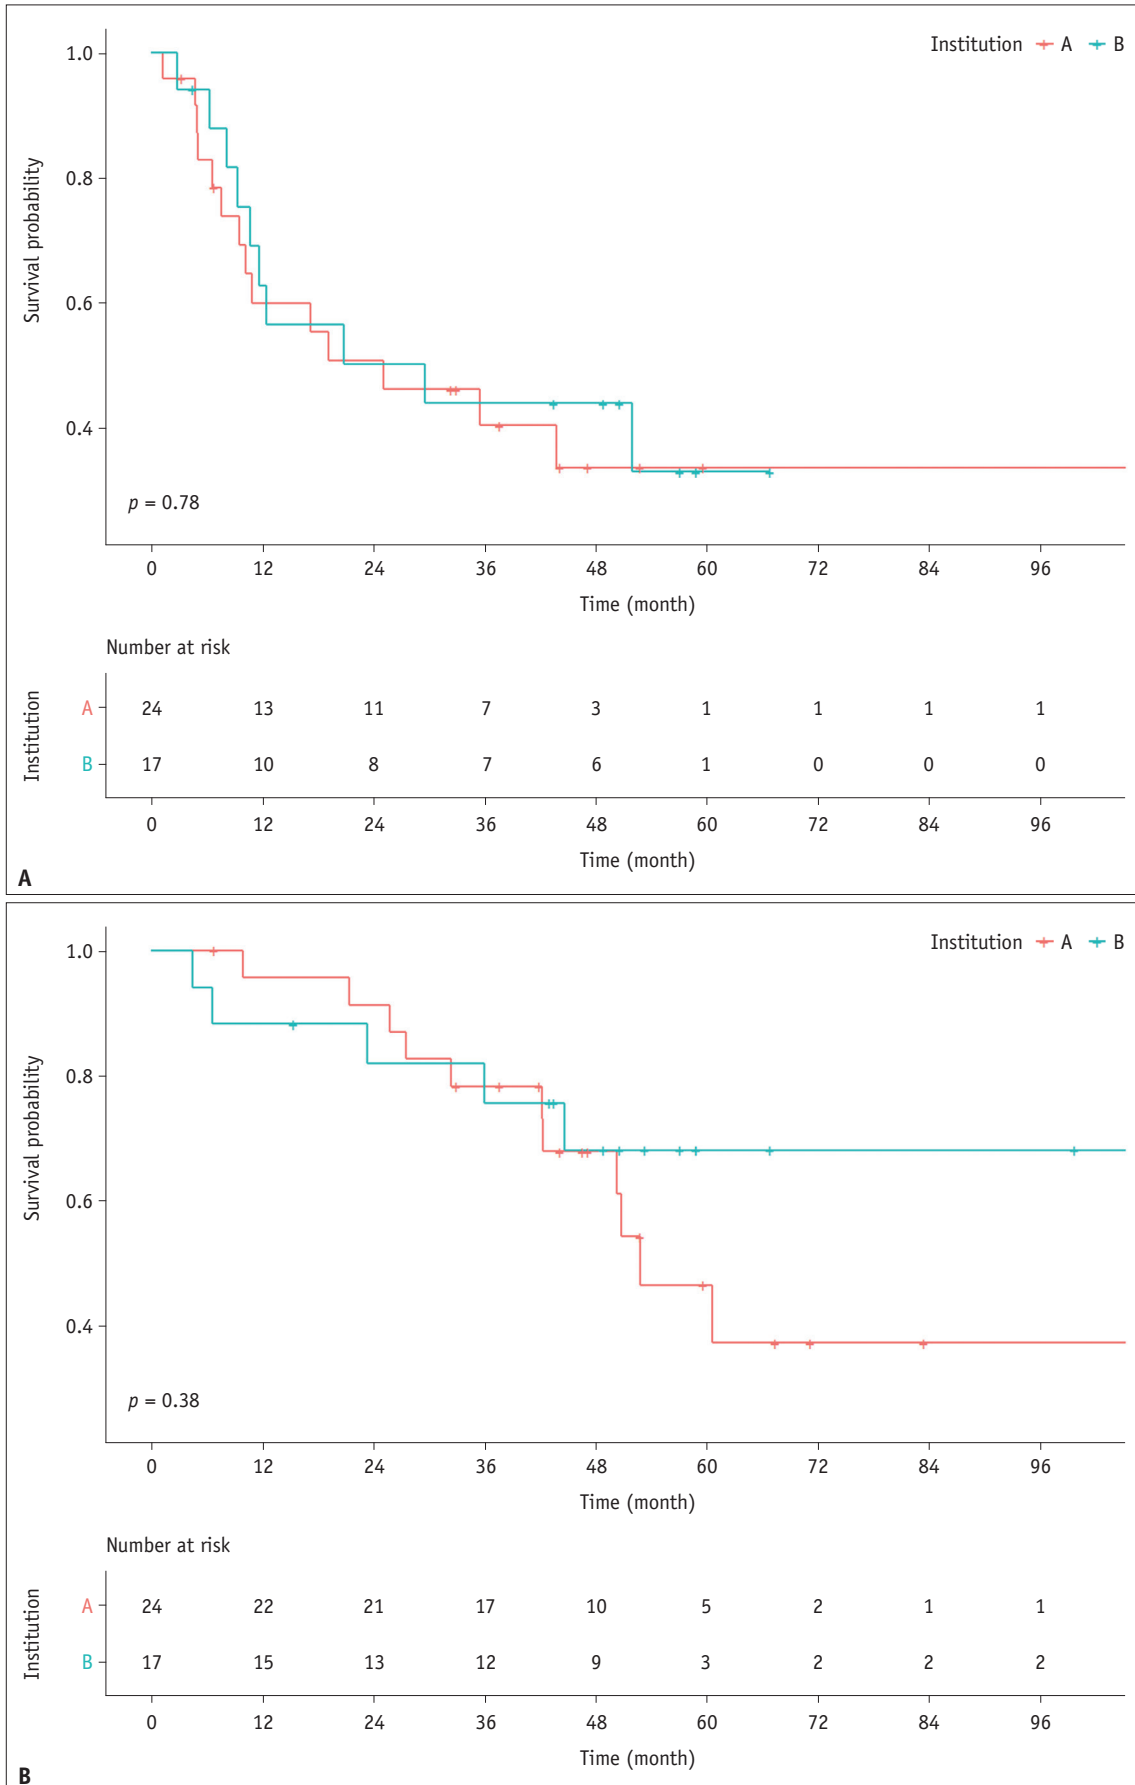

**Supplementary Fig. 1.** Kaplan–Meier survival curves for relapse-free survival (A) and overall survival (B) in patients with pneumonic-type invasive adenocarcinoma in institution A and B.
